# Supplementary material for: Drug Integrating Amphiphilic Nano-Assemblies: 2. Spatiotemporal Distribution within Inflammation Sites
Source: MDPI journal article supplement (doi:10.3390/pharmaceutics16050652), 2024-05-13
Supplement: s1 [file s1]

# Drug Integrating Amphiphilic Nano-Assemblies:

## 2. Spatiotemporal Distribution within Inflammation Sites

Teresa De Toni <sup>1,2,†</sup>, Teodora Dal Buono <sup>1,†</sup>, Chris M. Li <sup>1,3</sup>, Grisell C. Gonzalez <sup>1</sup>, Sung-Ting Chuang <sup>1</sup>, Peter Buchwald <sup>1,4</sup>, Alice A. Tomei <sup>1,2,3,5</sup> and Diana Velluto <sup>1,5,\*</sup>

<sup>1</sup> Diabetes Research Institute, Miller School of Medicine, University of Miami, Miami, FL 33136, USA; detoniteresa2@gmail.com (T.D.T.); txdl299@miami.edu (T.D.B.); cml229@med.miami.edu (C.M.L.); g.gonzalez29@umiami.edu (G.C.G.); sxc2158@med.miami.edu (S.-T.C.); pbuchwald@med.miami.edu (P.B.); atomei@med.miami.edu (A.A.T.)

<sup>2</sup> Department of Biomedical Engineering, University of Miami, Miami, FL 33146, USA

<sup>3</sup> Department of Microbiology and Immunology, Miller School of Medicine, University of Miami, Miami, FL 33136, USA

<sup>4</sup> Department of Molecular and Cellular Pharmacology, Miller School of Medicine, University of Miami, Miami, FL 33136, USA

<sup>5</sup> Department of Surgery, Miller School of Medicine, University of Miami, Miami, FL 33136, USA

\* Correspondence: dxv237@med.miami.edu

† These authors contributed equally to this work.

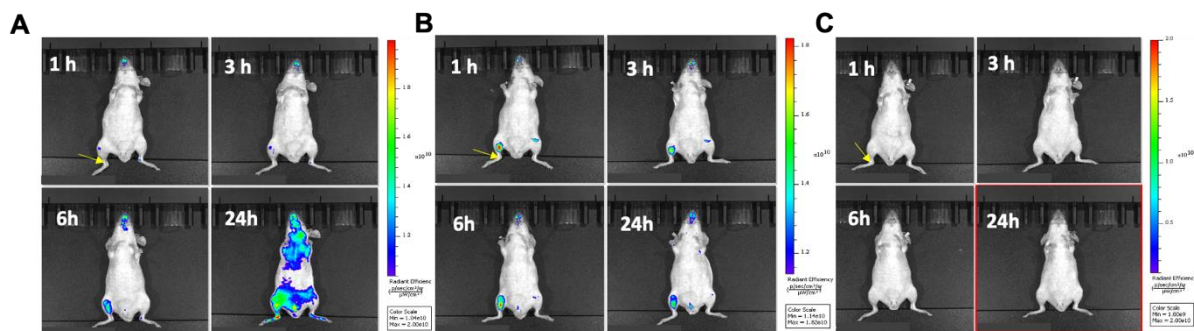

**Figure S1:** In vivo passive targeting of LPS inflamed site by nMIC-DiD and nFIB-DiD. SKH-1 hairless mice were treated with 25  $\mu$ L of lipopolysaccharides (LPS) injected subcutaneously into the right foot paw (RFP) as indicated by the yellow arrows. Right after inducing inflammation, mice were given 50  $\mu$ L of nMIC-DiD (A), nFIB-DiD (B) and free DiD (C) by tail vein (IV) infusion. Mice were imaged with the In Vivo Imaging System (IVIS) 1, 3, 6 and 24 hours after the IV infusions.

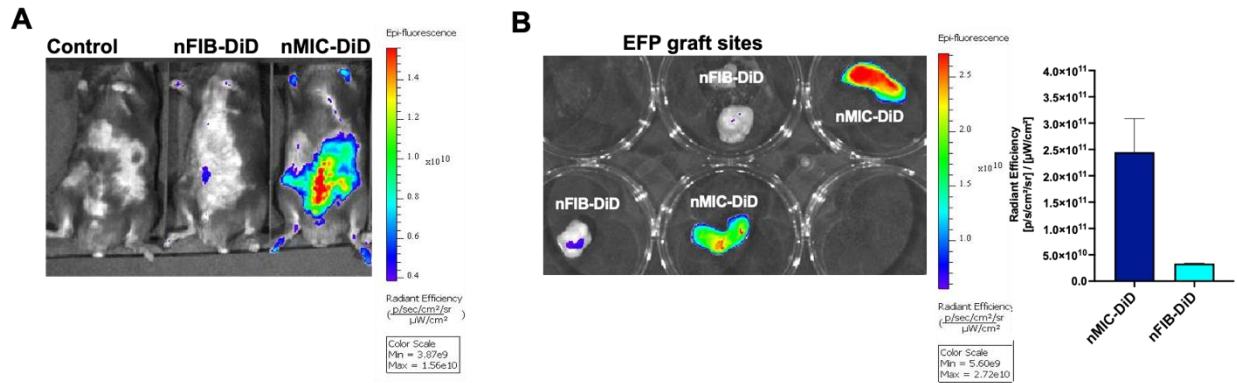

**Figure S2:** *In vivo* passive targeting of highly compromised EFP islet transplant site by nMIC-DiD and nFIB-DiD (model 2, pilot study). C57BL/6 mice bearing an islet graft in the EFP, were treated with 50 mL of either nMIC-DiD or nFIB-DiD via IV infusion. One day after infusion, IVIS analysis of whole-body (A) and ex-vivo explanted EFP organs (B) revealed that nFIB-DiD did not reach the implant site within 24 hours, whereas the nMIC-DiD did so efficiently. (C) ROI analysis of explanted EFP for mice treated with nMIC-DiD (dark blue) and nFIB-DiD (cyan). Data are mean  $\pm$  SD for  $n = 2$  animals.
